# Supplementary material
Source: MDPI journal article supplement (https://www.mdpi.com/2073-4344/8/3/99)
Supplement: s1 [file s1]

# Methyl Chloride Synthesis over Metal Chlorides Modified Mesoporous Alumina Catalyst

Yuwen Ji <sup>1,2</sup>, Feilong Zhang <sup>1,2</sup>, Feng Yu <sup>1,2</sup>, Jianshu Zhang <sup>1,2,\*</sup> and Jinli Zhang <sup>1,3</sup>

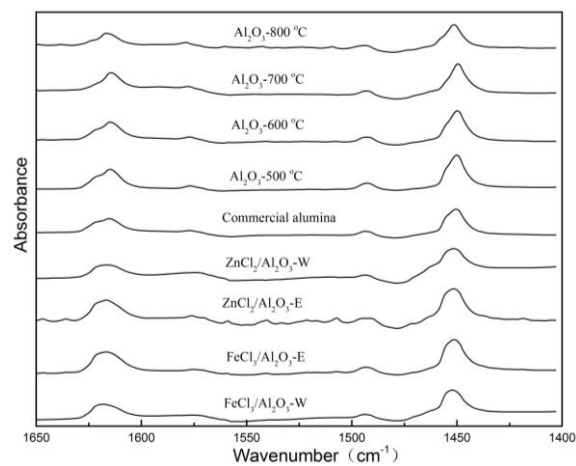

**Figure S1.** FTIR spectra of pyridine adsorbed on mesoporous aluminas and metal chlorides modified aluminas. Spectra are on the same scale and offset vertically for clarity.
